# Supplementary material for: The Effects of a Mediterranean Diet Intervention on Targeted Plasma Metabolic Biomarkers among US Firefighters: A Pilot Cluster-Randomized Trial
Source: PubMed Central journal article supplement (PMC7761450; doi:10.3390/nu12123610), 2020-11-24
Supplement: nutrients-12-03610-s001.pdf [file nutrients-12-03610-s001.pdf]

**ONLINE SUPPLEMENTARY INFORMATION**

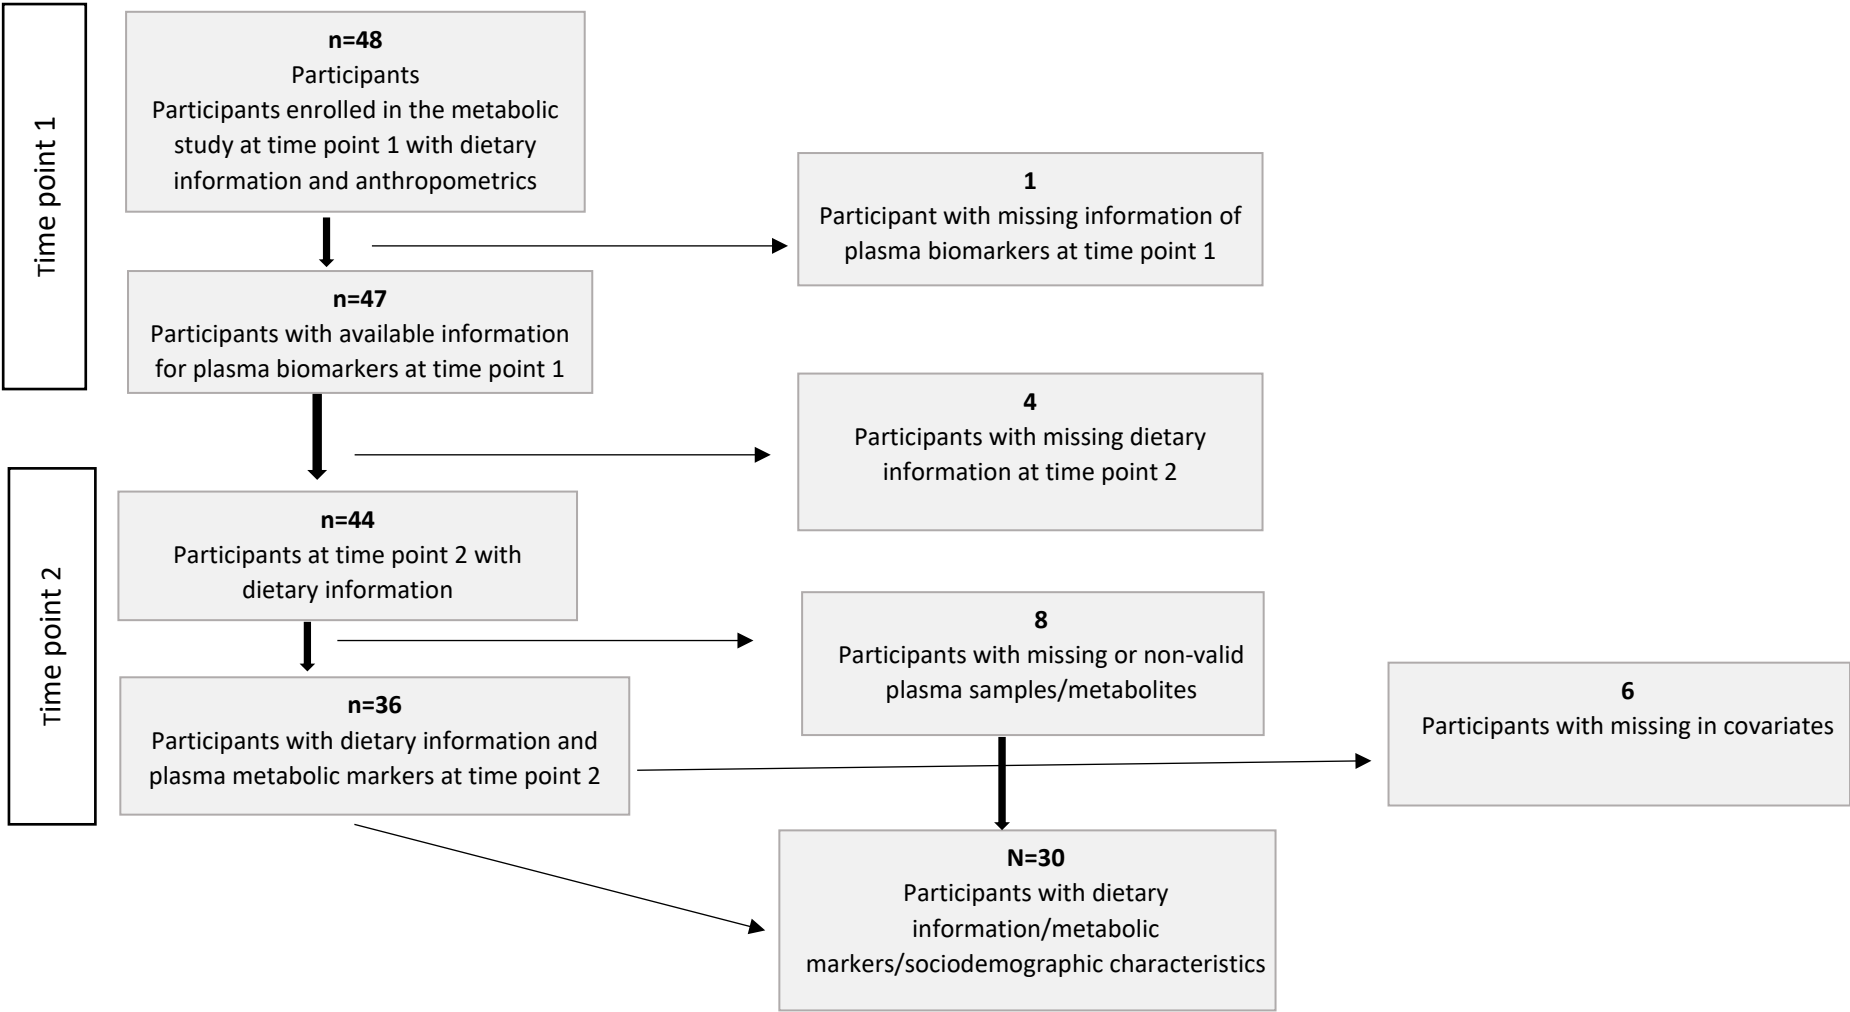

**Figure S1.** Flowchart of participants at time point 1 and 2 of the Feeding America’s Bravest trial.

**Figure S2.** Associations of unit changes in mMDS score by SD changes in plasma biomarkers between month 6 (time point 2) and baseline (time point 1) in all participants grouped together.

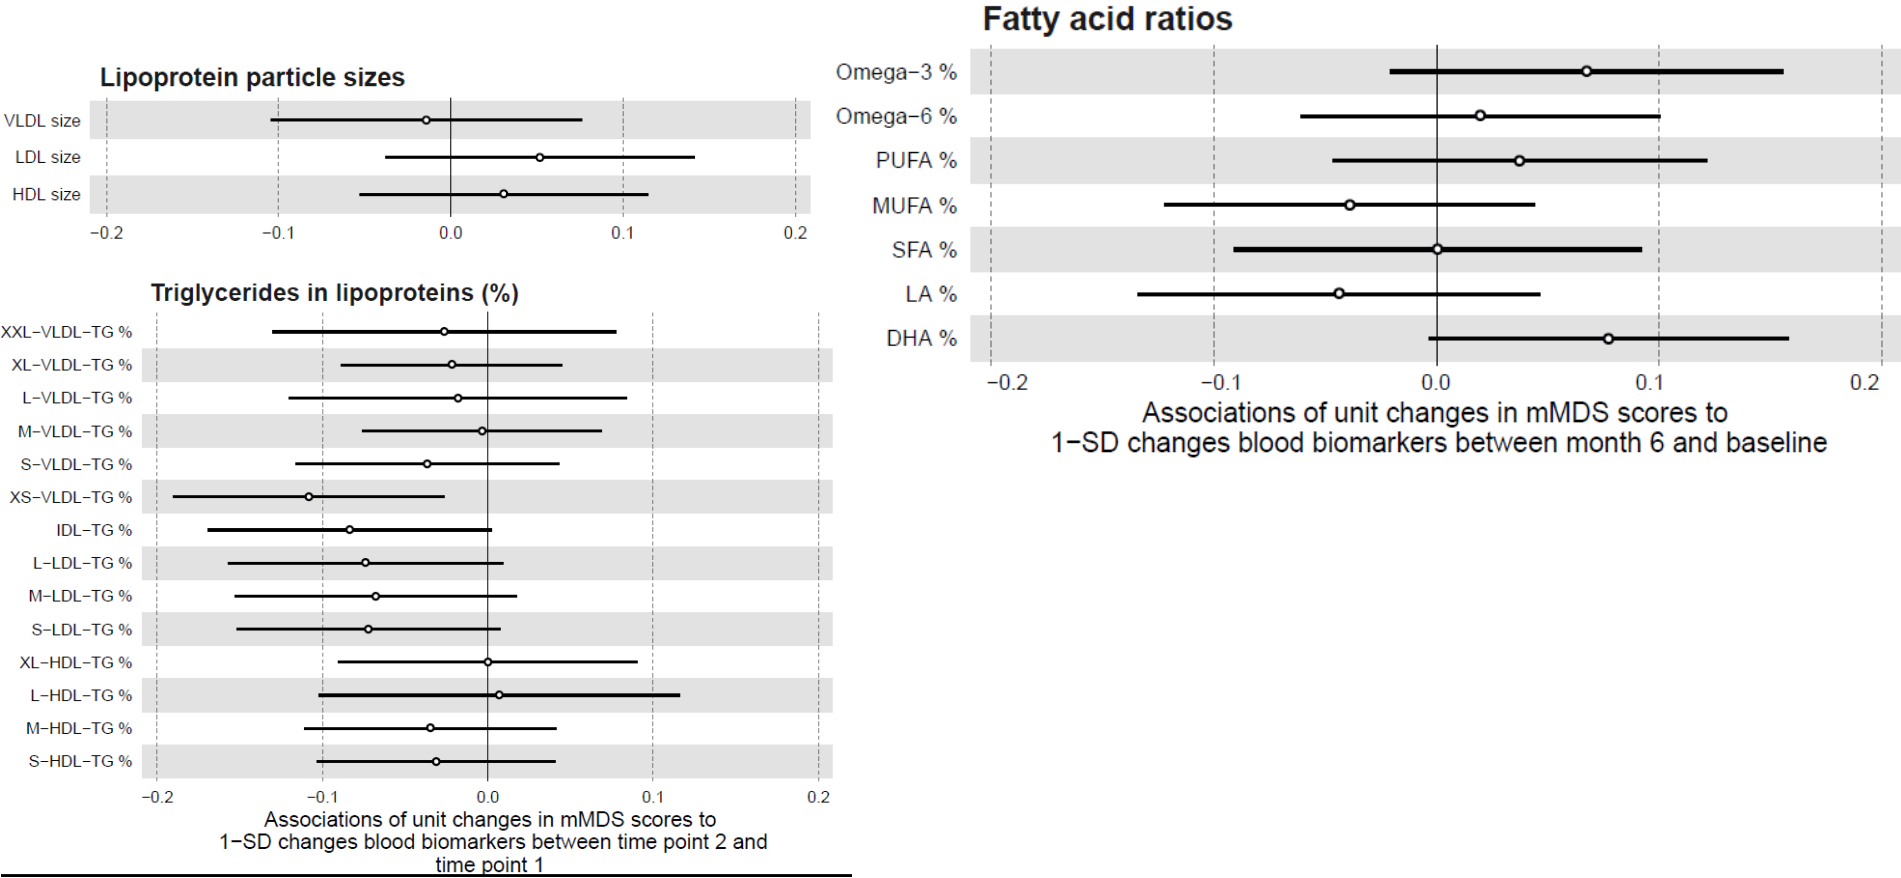

**Figure S3.** Association between biomarkers and the PREDIMED Score adherence (cross-sectional analysis). Red lines show the results for the participants at Baseline and black lines for the participants at follow up). Results show changes by SD and are displayed by hollow points and significant results by filled points along with their 95% confidence intervals

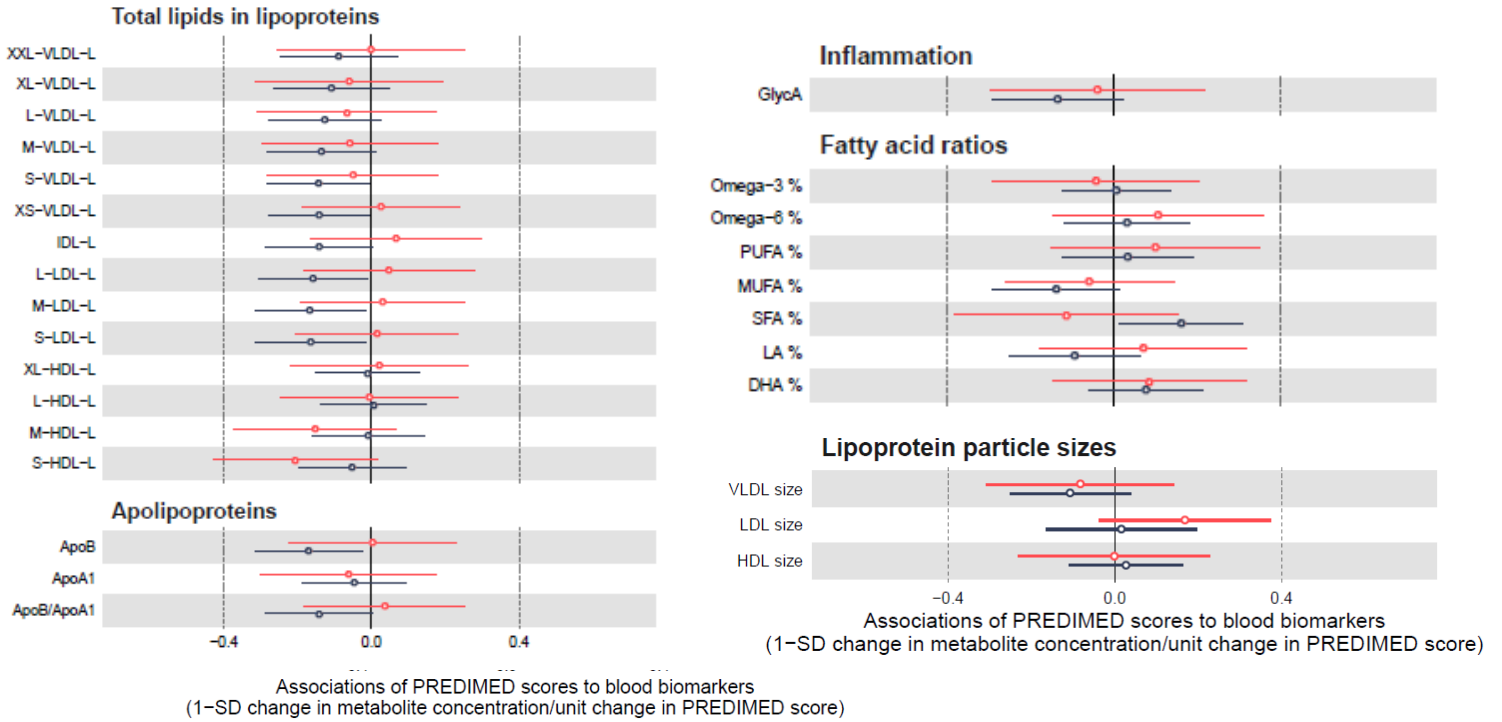

**Table S1.** Six-month effect of the Mediterranean Diet intervention on metabolic biomarkers (linear mixed model analysis with p-values corrected for multiple testing)

| Group        | Biomarker      | Estimate (per 1-SD change in biomarkers) | SE    | P-Value |
|--------------|----------------|------------------------------------------|-------|---------|
| Control      | Total_C        | -0.192                                   | 0.176 | 0.295   |
| Intervention | Total_C        | -0.330                                   | 0.189 | 0.104   |
| Control      | VLDL_C         | -0.132                                   | 0.177 | 0.469   |
| Intervention | VLDL_C         | -0.337                                   | 0.186 | 0.094   |
| Control      | Remnant_C      | -0.247                                   | 0.188 | 0.212   |
| Intervention | Remnant_C      | -0.410                                   | 0.209 | 0.072   |
| Control      | LDL_C          | -0.328                                   | 0.207 | 0.137   |
| Intervention | LDL_C          | -0.439                                   | 0.197 | 0.045   |
| Control      | HDL_C          | 0.215                                    | 0.094 | 0.040   |
| Intervention | HDL_C          | 0.146                                    | 0.095 | 0.148   |
| Control      | HDL2_C         | 0.210                                    | 0.087 | 0.032   |
| Intervention | HDL2_C         | 0.165                                    | 0.091 | 0.094   |
| Control      | HDL3_C         | 0.130                                    | 0.234 | 0.589   |
| Intervention | HDL3_C         | -0.123                                   | 0.142 | 0.403   |
| Control      | Total_CE       | -0.202                                   | 0.174 | 0.267   |
| Intervention | Total_CE       | -0.343                                   | 0.185 | 0.086   |
| Control      | Total_FC       | -0.148                                   | 0.191 | 0.452   |
| Intervention | Total_FC       | -0.315                                   | 0.198 | 0.135   |
| Control      | Total_TG       | 0.106                                    | 0.151 | 0.495   |
| Intervention | Total_TG       | -0.087                                   | 0.134 | 0.529   |
| Control      | VLDL_TG        | 0.096                                    | 0.156 | 0.548   |
| Intervention | VLDL_TG        | -0.090                                   | 0.140 | 0.530   |
| Control      | LDL_TG         | 0.144                                    | 0.206 | 0.497   |
| Intervention | LDL_TG         | -0.077                                   | 0.153 | 0.622   |
| Control      | HDL_TG         | 0.148                                    | 0.190 | 0.452   |
| Intervention | HDL_TG         | -0.125                                   | 0.171 | 0.477   |
| Control      | Phosphoglyc    | 0.264                                    | 0.171 | 0.146   |
| Intervention | Phosphoglyc    | -0.026                                   | 0.161 | 0.874   |
| Control      | TG_by_PG       | 0.008                                    | 0.167 | 0.964   |
| Intervention | TG_by_PG       | -0.078                                   | 0.127 | 0.550   |
| Control      | Cholines       | 0.274                                    | 0.178 | 0.148   |
| Intervention | Cholines       | -0.066                                   | 0.170 | 0.705   |
| Control      | Phosphatidylc  | 0.206                                    | 0.192 | 0.301   |
| Intervention | Phosphatidylc  | -0.032                                   | 0.168 | 0.852   |
| Control      | Sphingomyelins | -0.203                                   | 0.304 | 0.514   |
| Intervention | Sphingomyelins | 0.006                                    | 0.219 | 0.979   |
| Control      | ApoB           | -0.177                                   | 0.176 | 0.334   |
| Intervention | ApoB           | -0.367                                   | 0.187 | 0.071   |
| Control      | ApoA1          | 0.177                                    | 0.104 | 0.112   |
| Intervention | ApoA1          | 0.028                                    | 0.127 | 0.827   |
| Control      | ApoB_by_ApoA1  | -0.276                                   | 0.145 | 0.078   |
| Intervention | ApoB_by_ApoA1  | -0.354                                   | 0.145 | 0.030   |

|              |              |        |       |       |
|--------------|--------------|--------|-------|-------|
| Control      | Total_FA     | 0.070  | 0.168 | 0.683 |
| Intervention | Total_FA     | -0.167 | 0.150 | 0.286 |
| Control      | Unsaturation | -0.372 | 0.126 | 0.011 |
| Intervention | Unsaturation | -0.135 | 0.184 | 0.476 |
| Control      | Omega_3      | 0.010  | 0.112 | 0.928 |
| Intervention | Omega_3      | -0.081 | 0.202 | 0.697 |
| Control      | Omega_6      | 0.018  | 0.158 | 0.913 |
| Intervention | Omega_6      | -0.283 | 0.167 | 0.114 |
| Control      | PUFA         | 0.015  | 0.153 | 0.924 |
| Intervention | PUFA         | -0.244 | 0.163 | 0.157 |
| Control      | MUFA         | 0.076  | 0.196 | 0.705 |
| Intervention | MUFA         | -0.105 | 0.156 | 0.513 |
| Control      | SFA          | 0.121  | 0.160 | 0.462 |
| Intervention | SFA          | -0.158 | 0.155 | 0.325 |
| Control      | LA           | 0.094  | 0.187 | 0.625 |
| Intervention | LA           | -0.228 | 0.183 | 0.234 |
| Control      | DHA          | -0.022 | 0.190 | 0.911 |
| Intervention | DHA          | 0.102  | 0.228 | 0.663 |
| Control      | Omega_3_pct  | -0.144 | 0.142 | 0.327 |
| Intervention | Omega_3_pct  | 0.212  | 0.303 | 0.495 |
| Control      | Omega_6_pct  | -0.167 | 0.186 | 0.386 |
| Intervention | Omega_6_pct  | -0.203 | 0.187 | 0.297 |
| Control      | PUFA_pct     | -0.198 | 0.206 | 0.353 |
| Intervention | PUFA_pct     | -0.149 | 0.209 | 0.488 |
| Control      | MUFA_pct     | 0.096  | 0.296 | 0.751 |
| Intervention | MUFA_pct     | 0.173  | 0.184 | 0.363 |
| Control      | SFA_pct      | 0.339  | 0.294 | 0.269 |
| Intervention | SFA_pct      | 0.018  | 0.336 | 0.959 |
| Control      | LA_pct       | 0.051  | 0.258 | 0.846 |
| Intervention | LA_pct       | -0.139 | 0.274 | 0.620 |
| Control      | DHA_pct      | -0.239 | 0.370 | 0.529 |
| Intervention | DHA_pct      | 0.463  | 0.295 | 0.140 |
| Control      | Ala          | 0.569  | 0.266 | 0.052 |
| Intervention | Ala          | 0.081  | 0.159 | 0.618 |
| Control      | Gln          | -0.109 | 0.255 | 0.676 |
| Intervention | Gln          | -0.186 | 0.217 | 0.407 |
| Control      | His          | -0.271 | 0.350 | 0.452 |
| Intervention | His          | -0.964 | 0.342 | 0.015 |
| Control      | Ile          | 0.240  | 0.285 | 0.414 |
| Intervention | Ile          | 0.148  | 0.357 | 0.685 |
| Control      | Leu          | 0.332  | 0.310 | 0.304 |
| Intervention | Leu          | -0.066 | 0.378 | 0.865 |
| Control      | Val          | 0.308  | 0.269 | 0.272 |
| Intervention | Val          | 0.383  | 0.364 | 0.313 |
| Control      | Phe          | 0.443  | 0.312 | 0.180 |
| Intervention | Phe          | -0.264 | 0.370 | 0.489 |

|              |              |        |       |       |
|--------------|--------------|--------|-------|-------|
| Control      | Tyr          | 0.558  | 0.348 | 0.133 |
| Intervention | Tyr          | -0.154 | 0.290 | 0.604 |
| Control      | Glucose      | 0.268  | 0.103 | 0.022 |
| Intervention | Glucose      | -0.268 | 0.188 | 0.177 |
| Control      | Lactate      | -0.056 | 0.386 | 0.886 |
| Intervention | Lactate      | 0.815  | 0.200 | 0.001 |
| Control      | Citrate      | -0.184 | 0.296 | 0.545 |
| Intervention | Citrate      | -0.139 | 0.265 | 0.610 |
| Control      | Acetate      | -0.050 | 0.317 | 0.878 |
| Intervention | Acetate      | 0.125  | 0.213 | 0.567 |
| Control      | Acetoacetate | -0.245 | 0.160 | 0.150 |
| Intervention | Acetoacetate | -0.006 | 0.296 | 0.985 |
| Control      | bOHbutyrate  | -0.378 | 0.185 | 0.065 |
| Intervention | bOHbutyrate  | 0.072  | 0.372 | 0.850 |
| Control      | Creatinine   | 0.485  | 0.208 | 0.036 |
| Intervention | Creatinine   | 0.009  | 0.139 | 0.952 |
| Control      | Albumin      | -0.022 | 0.400 | 0.957 |
| Intervention | Albumin      | 0.099  | 0.333 | 0.770 |
| Control      | GlycA        | -0.166 | 0.191 | 0.399 |
| Intervention | GlycA        | -0.135 | 0.119 | 0.278 |
| Control      | XXL_VLDL_P   | -0.013 | 0.228 | 0.954 |
| Intervention | XXL_VLDL_P   | -0.336 | 0.202 | 0.120 |
| Control      | XXL_VLDL_L   | -0.013 | 0.232 | 0.955 |
| Intervention | XXL_VLDL_L   | -0.344 | 0.205 | 0.117 |
| Control      | XXL_VLDL_PL  | 0.009  | 0.221 | 0.968 |
| Intervention | XXL_VLDL_PL  | -0.302 | 0.189 | 0.133 |
| Control      | XXL_VLDL_C   | -0.086 | 0.224 | 0.707 |
| Intervention | XXL_VLDL_C   | -0.306 | 0.190 | 0.131 |
| Control      | XXL_VLDL_CE  | -0.140 | 0.225 | 0.545 |
| Intervention | XXL_VLDL_CE  | -0.329 | 0.191 | 0.108 |
| Control      | XXL_VLDL_FC  | -0.012 | 0.222 | 0.957 |
| Intervention | XXL_VLDL_FC  | -0.267 | 0.190 | 0.184 |
| Control      | XXL_VLDL_TG  | -0.002 | 0.233 | 0.994 |
| Intervention | XXL_VLDL_TG  | -0.352 | 0.209 | 0.117 |
| Control      | XL_VLDL_P    | 0.063  | 0.175 | 0.726 |
| Intervention | XL_VLDL_P    | -0.146 | 0.153 | 0.359 |
| Control      | XL_VLDL_L    | 0.061  | 0.187 | 0.748 |
| Intervention | XL_VLDL_L    | -0.169 | 0.161 | 0.314 |
| Control      | XL_VLDL_PL   | 0.022  | 0.188 | 0.908 |
| Intervention | XL_VLDL_PL   | -0.190 | 0.163 | 0.265 |
| Control      | XL_VLDL_C    | -0.048 | 0.210 | 0.824 |
| Intervention | XL_VLDL_C    | -0.242 | 0.173 | 0.186 |
| Control      | XL_VLDL_CE   | -0.031 | 0.198 | 0.880 |
| Intervention | XL_VLDL_CE   | -0.220 | 0.164 | 0.204 |
| Control      | XL_VLDL_FC   | -0.069 | 0.221 | 0.760 |
| Intervention | XL_VLDL_FC   | -0.263 | 0.183 | 0.174 |

|              |            |        |       |       |
|--------------|------------|--------|-------|-------|
| Control      | XL_VLDL_TG | 0.096  | 0.174 | 0.591 |
| Intervention | XL_VLDL_TG | -0.131 | 0.153 | 0.408 |
| Control      | L_VLDL_P   | 0.069  | 0.151 | 0.654 |
| Intervention | L_VLDL_P   | -0.081 | 0.143 | 0.581 |
| Control      | L_VLDL_L   | 0.091  | 0.167 | 0.597 |
| Intervention | L_VLDL_L   | -0.098 | 0.155 | 0.538 |
| Control      | L_VLDL_PL  | 0.068  | 0.153 | 0.666 |
| Intervention | L_VLDL_PL  | -0.099 | 0.147 | 0.510 |
| Control      | L_VLDL_C   | 0.040  | 0.161 | 0.808 |
| Intervention | L_VLDL_C   | -0.134 | 0.152 | 0.393 |
| Control      | L_VLDL_CE  | 0.023  | 0.151 | 0.880 |
| Intervention | L_VLDL_CE  | -0.122 | 0.148 | 0.422 |
| Control      | L_VLDL_FC  | 0.054  | 0.167 | 0.749 |
| Intervention | L_VLDL_FC  | -0.139 | 0.154 | 0.384 |
| Control      | L_VLDL_TG  | 0.097  | 0.162 | 0.562 |
| Intervention | L_VLDL_TG  | -0.076 | 0.151 | 0.625 |
| Control      | M_VLDL_P   | 0.040  | 0.143 | 0.787 |
| Intervention | M_VLDL_P   | -0.110 | 0.138 | 0.440 |
| Control      | M_VLDL_L   | 0.051  | 0.160 | 0.752 |
| Intervention | M_VLDL_L   | -0.125 | 0.147 | 0.412 |
| Control      | M_VLDL_PL  | 0.040  | 0.148 | 0.789 |
| Intervention | M_VLDL_PL  | -0.122 | 0.142 | 0.407 |
| Control      | M_VLDL_C   | -0.013 | 0.158 | 0.936 |
| Intervention | M_VLDL_C   | -0.184 | 0.156 | 0.259 |
| Control      | M_VLDL_CE  | -0.080 | 0.157 | 0.620 |
| Intervention | M_VLDL_CE  | -0.239 | 0.165 | 0.171 |
| Control      | M_VLDL_FC  | 0.060  | 0.151 | 0.697 |
| Intervention | M_VLDL_FC  | -0.114 | 0.143 | 0.442 |
| Control      | M_VLDL_TG  | 0.073  | 0.155 | 0.644 |
| Intervention | M_VLDL_TG  | -0.091 | 0.141 | 0.532 |
| Control      | S_VLDL_P   | 0.044  | 0.141 | 0.761 |
| Intervention | S_VLDL_P   | -0.140 | 0.152 | 0.374 |
| Control      | S_VLDL_L   | 0.037  | 0.154 | 0.812 |
| Intervention | S_VLDL_L   | -0.157 | 0.154 | 0.327 |
| Control      | S_VLDL_PL  | 0.100  | 0.154 | 0.526 |
| Intervention | S_VLDL_PL  | -0.114 | 0.155 | 0.477 |
| Control      | S_VLDL_C   | -0.134 | 0.179 | 0.467 |
| Intervention | S_VLDL_C   | -0.348 | 0.193 | 0.095 |
| Control      | S_VLDL_CE  | -0.277 | 0.203 | 0.196 |
| Intervention | S_VLDL_CE  | -0.471 | 0.217 | 0.049 |
| Control      | S_VLDL_FC  | 0.075  | 0.157 | 0.639 |
| Intervention | S_VLDL_FC  | -0.151 | 0.159 | 0.362 |
| Control      | S_VLDL_TG  | 0.107  | 0.141 | 0.462 |
| Intervention | S_VLDL_TG  | -0.053 | 0.133 | 0.700 |
| Control      | XS_VLDL_P  | -0.185 | 0.163 | 0.278 |
| Intervention | XS_VLDL_P  | -0.364 | 0.189 | 0.076 |

---

|              |            |        |       |       |
|--------------|------------|--------|-------|-------|
| Control      | XS_VLDL_L  | -0.237 | 0.167 | 0.180 |
| Intervention | XS_VLDL_L  | -0.390 | 0.197 | 0.069 |
| Control      | XS_VLDL_PL | -0.205 | 0.175 | 0.263 |
| Intervention | XS_VLDL_PL | -0.338 | 0.180 | 0.083 |
| Control      | XS_VLDL_C  | -0.422 | 0.229 | 0.088 |
| Intervention | XS_VLDL_C  | -0.559 | 0.246 | 0.041 |
| Control      | XS_VLDL_CE | -0.457 | 0.265 | 0.108 |
| Intervention | XS_VLDL_CE | -0.574 | 0.267 | 0.051 |
| Control      | XS_VLDL_FC | -0.251 | 0.188 | 0.204 |
| Intervention | XS_VLDL_FC | -0.438 | 0.195 | 0.043 |
| Control      | XS_VLDL_TG | 0.136  | 0.167 | 0.429 |
| Intervention | XS_VLDL_TG | -0.014 | 0.140 | 0.922 |
| Control      | IDL_P      | -0.273 | 0.188 | 0.170 |
| Intervention | IDL_P      | -0.418 | 0.204 | 0.061 |
| Control      | IDL_L      | -0.313 | 0.185 | 0.115 |
| Intervention | IDL_L      | -0.403 | 0.206 | 0.072 |
| Control      | IDL_PL     | -0.309 | 0.192 | 0.132 |
| Intervention | IDL_PL     | -0.435 | 0.194 | 0.043 |
| Control      | IDL_C      | -0.355 | 0.202 | 0.102 |
| Intervention | IDL_C      | -0.440 | 0.218 | 0.065 |
| Control      | IDL_CE     | -0.362 | 0.212 | 0.112 |
| Intervention | IDL_CE     | -0.448 | 0.231 | 0.075 |
| Control      | IDL_FC     | -0.296 | 0.186 | 0.136 |
| Intervention | IDL_FC     | -0.424 | 0.181 | 0.036 |
| Control      | IDL_TG     | 0.156  | 0.216 | 0.484 |
| Intervention | IDL_TG     | 0.001  | 0.152 | 0.995 |
| Control      | L_LDL_P    | -0.257 | 0.199 | 0.219 |
| Intervention | L_LDL_P    | -0.427 | 0.201 | 0.054 |
| Control      | L_LDL_L    | -0.297 | 0.192 | 0.147 |
| Intervention | L_LDL_L    | -0.404 | 0.200 | 0.064 |
| Control      | L_LDL_PL   | -0.276 | 0.195 | 0.181 |
| Intervention | L_LDL_PL   | -0.400 | 0.207 | 0.075 |
| Control      | L_LDL_C    | -0.326 | 0.202 | 0.130 |
| Intervention | L_LDL_C    | -0.439 | 0.203 | 0.050 |
| Control      | L_LDL_CE   | -0.318 | 0.204 | 0.143 |
| Intervention | L_LDL_CE   | -0.447 | 0.205 | 0.048 |
| Control      | L_LDL_FC   | -0.311 | 0.199 | 0.141 |
| Intervention | L_LDL_FC   | -0.426 | 0.197 | 0.050 |
| Control      | L_LDL_TG   | 0.119  | 0.209 | 0.578 |
| Intervention | L_LDL_TG   | -0.078 | 0.160 | 0.633 |
| Control      | M_LDL_P    | -0.233 | 0.213 | 0.295 |
| Intervention | M_LDL_P    | -0.438 | 0.200 | 0.047 |
| Control      | M_LDL_L    | -0.268 | 0.209 | 0.223 |
| Intervention | M_LDL_L    | -0.423 | 0.198 | 0.052 |
| Control      | M_LDL_PL   | -0.214 | 0.197 | 0.296 |
| Intervention | M_LDL_PL   | -0.379 | 0.213 | 0.099 |



|              |           |        |       |       |
|--------------|-----------|--------|-------|-------|
| Control      | M_LDL_C   | -0.304 | 0.221 | 0.191 |
| Intervention | M_LDL_C   | -0.463 | 0.199 | 0.037 |
| Control      | M_LDL_CE  | -0.301 | 0.221 | 0.196 |
| Intervention | M_LDL_CE  | -0.468 | 0.196 | 0.033 |
| Control      | M_LDL_FC  | -0.288 | 0.224 | 0.221 |
| Intervention | M_LDL_FC  | -0.462 | 0.219 | 0.055 |
| Control      | M_LDL_TG  | 0.187  | 0.239 | 0.448 |
| Intervention | M_LDL_TG  | -0.051 | 0.168 | 0.765 |
| Control      | S_LDL_P   | -0.195 | 0.213 | 0.377 |
| Intervention | S_LDL_P   | -0.434 | 0.199 | 0.048 |
| Control      | S_LDL_L   | -0.225 | 0.213 | 0.310 |
| Intervention | S_LDL_L   | -0.430 | 0.198 | 0.049 |
| Control      | S_LDL_PL  | -0.131 | 0.203 | 0.531 |
| Intervention | S_LDL_PL  | -0.361 | 0.214 | 0.115 |
| Control      | S_LDL_C   | -0.280 | 0.225 | 0.235 |
| Intervention | S_LDL_C   | -0.472 | 0.198 | 0.033 |
| Control      | S_LDL_CE  | -0.280 | 0.221 | 0.227 |
| Intervention | S_LDL_CE  | -0.463 | 0.194 | 0.033 |
| Control      | S_LDL_FC  | -0.255 | 0.246 | 0.319 |
| Intervention | S_LDL_FC  | -0.515 | 0.221 | 0.037 |
| Control      | S_LDL_TG  | 0.142  | 0.163 | 0.399 |
| Intervention | S_LDL_TG  | -0.116 | 0.139 | 0.418 |
| Control      | XL_HDL_P  | 0.074  | 0.121 | 0.554 |
| Intervention | XL_HDL_P  | -0.038 | 0.147 | 0.800 |
| Control      | XL_HDL_L  | 0.080  | 0.142 | 0.584 |
| Intervention | XL_HDL_L  | -0.057 | 0.163 | 0.732 |
| Control      | XL_HDL_PL | 0.156  | 0.149 | 0.312 |
| Intervention | XL_HDL_PL | 0.096  | 0.161 | 0.562 |
| Control      | XL_HDL_C  | -0.010 | 0.155 | 0.949 |
| Intervention | XL_HDL_C  | -0.194 | 0.169 | 0.273 |
| Control      | XL_HDL_CE | -0.025 | 0.172 | 0.886 |
| Intervention | XL_HDL_CE | -0.250 | 0.179 | 0.186 |
| Control      | XL_HDL_FC | 0.026  | 0.118 | 0.825 |
| Intervention | XL_HDL_FC | -0.036 | 0.142 | 0.802 |
| Control      | XL_HDL_TG | -0.121 | 0.287 | 0.680 |
| Intervention | XL_HDL_TG | -0.492 | 0.277 | 0.100 |
| Control      | L_HDL_P   | 0.171  | 0.086 | 0.069 |
| Intervention | L_HDL_P   | 0.115  | 0.086 | 0.205 |
| Control      | L_HDL_L   | 0.177  | 0.089 | 0.067 |
| Intervention | L_HDL_L   | 0.102  | 0.078 | 0.217 |
| Control      | L_HDL_PL  | 0.185  | 0.082 | 0.042 |
| Intervention | L_HDL_PL  | 0.113  | 0.079 | 0.178 |
| Control      | L_HDL_C   | 0.163  | 0.102 | 0.134 |
| Intervention | L_HDL_C   | 0.121  | 0.090 | 0.200 |
| Control      | L_HDL_CE  | 0.167  | 0.101 | 0.123 |
| Intervention | L_HDL_CE  | 0.122  | 0.090 | 0.197 |

|              |                 |        |       |       |
|--------------|-----------------|--------|-------|-------|
| Control      | L_HDL_FC        | 0.137  | 0.104 | 0.208 |
| Intervention | L_HDL_FC        | 0.130  | 0.092 | 0.180 |
| Control      | L_HDL_TG        | 0.140  | 0.148 | 0.363 |
| Intervention | L_HDL_TG        | -0.153 | 0.149 | 0.324 |
| Control      | M_HDL_P         | 0.498  | 0.147 | 0.005 |
| Intervention | M_HDL_P         | 0.386  | 0.195 | 0.069 |
| Control      | M_HDL_L         | 0.485  | 0.146 | 0.006 |
| Intervention | M_HDL_L         | 0.387  | 0.181 | 0.052 |
| Control      | M_HDL_PL        | 0.524  | 0.158 | 0.006 |
| Intervention | M_HDL_PL        | 0.353  | 0.194 | 0.091 |
| Control      | M_HDL_C         | 0.412  | 0.113 | 0.003 |
| Intervention | M_HDL_C         | 0.390  | 0.159 | 0.029 |
| Control      | M_HDL_CE        | 0.400  | 0.111 | 0.003 |
| Intervention | M_HDL_CE        | 0.403  | 0.158 | 0.024 |
| Control      | M_HDL_FC        | 0.455  | 0.129 | 0.004 |
| Intervention | M_HDL_FC        | 0.336  | 0.171 | 0.072 |
| Control      | M_HDL_TG        | 0.187  | 0.178 | 0.312 |
| Intervention | M_HDL_TG        | 0.054  | 0.167 | 0.751 |
| Control      | S_HDL_P         | 0.518  | 0.223 | 0.037 |
| Intervention | S_HDL_P         | 0.313  | 0.263 | 0.255 |
| Control      | S_HDL_L         | 0.505  | 0.227 | 0.044 |
| Intervention | S_HDL_L         | 0.319  | 0.253 | 0.230 |
| Control      | S_HDL_PL        | 0.593  | 0.241 | 0.029 |
| Intervention | S_HDL_PL        | 0.401  | 0.286 | 0.184 |
| Control      | S_HDL_C         | 0.248  | 0.320 | 0.452 |
| Intervention | S_HDL_C         | 0.177  | 0.262 | 0.512 |
| Control      | S_HDL_CE        | 0.178  | 0.332 | 0.601 |
| Intervention | S_HDL_CE        | 0.138  | 0.264 | 0.610 |
| Control      | S_HDL_FC        | 0.600  | 0.190 | 0.008 |
| Intervention | S_HDL_FC        | 0.353  | 0.292 | 0.248 |
| Control      | S_HDL_TG        | 0.135  | 0.141 | 0.358 |
| Intervention | S_HDL_TG        | -0.050 | 0.117 | 0.676 |
| Control      | VLDL_size       | 0.218  | 0.187 | 0.265 |
| Intervention | VLDL_size       | -0.005 | 0.151 | 0.972 |
| Control      | LDL_size        | -0.262 | 0.249 | 0.311 |
| Intervention | LDL_size        | 0.036  | 0.232 | 0.880 |
| Control      | HDL_size        | 0.064  | 0.104 | 0.546 |
| Intervention | HDL_size        | 0.032  | 0.095 | 0.738 |
| Control      | XXL_VLDL_PL_pct | 0.601  | 0.407 | 0.168 |
| Intervention | XXL_VLDL_PL_pct | 0.005  | 0.176 | 0.978 |
| Control      | XXL_VLDL_C_pct  | -0.223 | 0.348 | 0.534 |
| Intervention | XXL_VLDL_C_pct  | -0.189 | 0.186 | 0.349 |
| Control      | XXL_VLDL_CE_pct | -0.692 | 0.368 | 0.087 |
| Intervention | XXL_VLDL_CE_pct | -0.152 | 0.172 | 0.409 |
| Control      | XXL_VLDL_FC_pct | 0.428  | 0.301 | 0.183 |
| Intervention | XXL_VLDL_FC_pct | -0.193 | 0.207 | 0.386 |

|              |                 |        |       |       |
|--------------|-----------------|--------|-------|-------|
| Control      | XXL_VLDL_TG_pct | 0.021  | 0.148 | 0.891 |
| Intervention | XXL_VLDL_TG_pct | 0.192  | 0.194 | 0.359 |
| Control      | XL_VLDL_PL_pct  | 0.397  | 0.328 | 0.257 |
| Intervention | XL_VLDL_PL_pct  | -0.183 | 0.061 | 0.015 |
| Control      | XL_VLDL_C_pct   | 0.004  | 0.329 | 0.991 |
| Intervention | XL_VLDL_C_pct   | -0.273 | 0.158 | 0.117 |
| Control      | XL_VLDL_CE_pct  | 0.058  | 0.336 | 0.868 |
| Intervention | XL_VLDL_CE_pct  | -0.151 | 0.148 | 0.335 |
| Control      | XL_VLDL_FC_pct  | -0.093 | 0.385 | 0.815 |
| Intervention | XL_VLDL_FC_pct  | -0.498 | 0.228 | 0.056 |
| Control      | XL_VLDL_TG_pct  | 0.034  | 0.197 | 0.866 |
| Intervention | XL_VLDL_TG_pct  | 0.302  | 0.125 | 0.039 |
| Control      | L_VLDL_PL_pct   | -0.003 | 0.030 | 0.909 |
| Intervention | L_VLDL_PL_pct   | -0.034 | 0.029 | 0.260 |
| Control      | L_VLDL_C_pct    | -0.125 | 0.067 | 0.087 |
| Intervention | L_VLDL_C_pct    | -0.303 | 0.116 | 0.026 |
| Control      | L_VLDL_CE_pct   | -0.265 | 0.068 | 0.002 |
| Intervention | L_VLDL_CE_pct   | -0.064 | 0.067 | 0.365 |
| Control      | L_VLDL_FC_pct   | 0.129  | 0.142 | 0.383 |
| Intervention | L_VLDL_FC_pct   | -0.692 | 0.374 | 0.094 |
| Control      | L_VLDL_TG_pct   | 0.176  | 0.101 | 0.110 |
| Intervention | L_VLDL_TG_pct   | 0.395  | 0.145 | 0.021 |
| Control      | M_VLDL_PL_pct   | -0.114 | 0.254 | 0.661 |
| Intervention | M_VLDL_PL_pct   | -0.049 | 0.239 | 0.839 |
| Control      | M_VLDL_C_pct    | -0.252 | 0.096 | 0.020 |
| Intervention | M_VLDL_C_pct    | -0.190 | 0.125 | 0.153 |
| Control      | M_VLDL_CE_pct   | -0.417 | 0.079 | 0.010 |
| Intervention | M_VLDL_CE_pct   | -0.349 | 0.143 | 0.030 |
| Control      | M_VLDL_FC_pct   | 0.109  | 0.059 | 0.089 |
| Intervention | M_VLDL_FC_pct   | 0.145  | 0.188 | 0.455 |
| Control      | M_VLDL_TG_pct   | 0.296  | 0.107 | 0.016 |
| Intervention | M_VLDL_TG_pct   | 0.231  | 0.127 | 0.091 |
| Control      | S_VLDL_PL_pct   | 0.283  | 0.191 | 0.162 |
| Intervention | S_VLDL_PL_pct   | 0.318  | 0.211 | 0.155 |
| Control      | S_VLDL_C_pct    | -0.515 | 0.177 | 0.012 |
| Intervention | S_VLDL_C_pct    | -0.512 | 0.161 | 0.007 |
| Control      | S_VLDL_CE_pct   | -0.595 | 0.180 | 0.006 |
| Intervention | S_VLDL_CE_pct   | -0.538 | 0.176 | 0.009 |
| Control      | S_VLDL_FC_pct   | 0.308  | 0.285 | 0.300 |
| Intervention | S_VLDL_FC_pct   | 0.064  | 0.132 | 0.637 |
| Control      | S_VLDL_TG_pct   | 0.317  | 0.151 | 0.056 |
| Intervention | S_VLDL_TG_pct   | 0.329  | 0.110 | 0.010 |
| Control      | XS_VLDL_PL_pct  | 0.066  | 0.235 | 0.783 |
| Intervention | XS_VLDL_PL_pct  | 0.186  | 0.216 | 0.404 |
| Control      | XS_VLDL_C_pct   | -0.588 | 0.335 | 0.103 |
| Intervention | XS_VLDL_C_pct   | -0.444 | 0.251 | 0.100 |

|              |                |        |       |       |
|--------------|----------------|--------|-------|-------|
| Control      | XS_VLDL_CE_pct | -0.578 | 0.347 | 0.120 |
| Intervention | XS_VLDL_CE_pct | -0.407 | 0.286 | 0.177 |
| Control      | XS_VLDL_FC_pct | -0.121 | 0.283 | 0.676 |
| Intervention | XS_VLDL_FC_pct | -0.156 | 0.167 | 0.370 |
| Control      | XS_VLDL_TG_pct | 0.459  | 0.224 | 0.061 |
| Intervention | XS_VLDL_TG_pct | 0.360  | 0.180 | 0.067 |
| Control      | IDL_PL_pct     | 0.196  | 0.172 | 0.275 |
| Intervention | IDL_PL_pct     | 0.071  | 0.240 | 0.773 |
| Control      | IDL_C_pct      | -0.547 | 0.286 | 0.078 |
| Intervention | IDL_C_pct      | -0.380 | 0.275 | 0.191 |
| Control      | IDL_CE_pct     | -0.505 | 0.309 | 0.126 |
| Intervention | IDL_CE_pct     | -0.304 | 0.327 | 0.369 |
| Control      | IDL_FC_pct     | -0.114 | 0.184 | 0.544 |
| Intervention | IDL_FC_pct     | -0.164 | 0.123 | 0.207 |
| Control      | IDL_TG_pct     | 0.514  | 0.279 | 0.089 |
| Intervention | IDL_TG_pct     | 0.428  | 0.195 | 0.047 |
| Control      | L_LDL_PL_pct   | 0.347  | 0.187 | 0.086 |
| Intervention | L_LDL_PL_pct   | 0.349  | 0.171 | 0.062 |
| Control      | L_LDL_C_pct    | -0.563 | 0.247 | 0.040 |
| Intervention | L_LDL_C_pct    | -0.491 | 0.204 | 0.032 |
| Control      | L_LDL_CE_pct   | -0.443 | 0.208 | 0.053 |
| Intervention | L_LDL_CE_pct   | -0.399 | 0.217 | 0.089 |
| Control      | L_LDL_FC_pct   | -0.041 | 0.141 | 0.777 |
| Intervention | L_LDL_FC_pct   | 0.029  | 0.137 | 0.837 |
| Control      | L_LDL_TG_pct   | 0.541  | 0.296 | 0.091 |
| Intervention | L_LDL_TG_pct   | 0.456  | 0.192 | 0.033 |
| Control      | M_LDL_PL_pct   | 0.373  | 0.261 | 0.177 |
| Intervention | M_LDL_PL_pct   | 0.386  | 0.141 | 0.017 |
| Control      | M_LDL_C_pct    | -0.492 | 0.230 | 0.052 |
| Intervention | M_LDL_C_pct    | -0.447 | 0.135 | 0.006 |
| Control      | M_LDL_CE_pct   | -0.414 | 0.193 | 0.051 |
| Intervention | M_LDL_CE_pct   | -0.364 | 0.129 | 0.014 |
| Control      | M_LDL_FC_pct   | 0.190  | 0.150 | 0.229 |
| Intervention | M_LDL_FC_pct   | 0.220  | 0.140 | 0.141 |
| Control      | M_LDL_TG_pct   | 0.610  | 0.285 | 0.052 |
| Intervention | M_LDL_TG_pct   | 0.509  | 0.211 | 0.031 |
| Control      | S_LDL_PL_pct   | 0.430  | 0.239 | 0.095 |
| Intervention | S_LDL_PL_pct   | 0.428  | 0.148 | 0.013 |
| Control      | S_LDL_C_pct    | -0.487 | 0.231 | 0.055 |
| Intervention | S_LDL_C_pct    | -0.397 | 0.130 | 0.009 |
| Control      | S_LDL_CE_pct   | -0.415 | 0.194 | 0.052 |
| Intervention | S_LDL_CE_pct   | -0.308 | 0.123 | 0.026 |
| Control      | S_LDL_FC_pct   | 0.096  | 0.134 | 0.484 |
| Intervention | S_LDL_FC_pct   | 0.027  | 0.140 | 0.849 |
| Control      | S_LDL_TG_pct   | 0.439  | 0.210 | 0.056 |
| Intervention | S_LDL_TG_pct   | 0.298  | 0.126 | 0.034 |

---

|              |               |        |       |       |
|--------------|---------------|--------|-------|-------|
| Control      | XL_HDL_PL_pct | 0.205  | 0.176 | 0.274 |
| Intervention | XL_HDL_PL_pct | 0.347  | 0.146 | 0.044 |
| Control      | XL_HDL_C_pct  | -0.256 | 0.266 | 0.361 |
| Intervention | XL_HDL_C_pct  | -0.606 | 0.350 | 0.122 |
| Control      | XL_HDL_CE_pct | -0.251 | 0.296 | 0.418 |
| Intervention | XL_HDL_CE_pct | -0.704 | 0.313 | 0.054 |
| Control      | XL_HDL_FC_pct | -0.189 | 0.130 | 0.182 |
| Intervention | XL_HDL_FC_pct | -0.079 | 0.416 | 0.854 |
| Control      | XL_HDL_TG_pct | -0.361 | 0.330 | 0.302 |
| Intervention | XL_HDL_TG_pct | -0.568 | 0.436 | 0.228 |
| Control      | L_HDL_PL_pct  | -0.137 | 0.164 | 0.422 |
| Intervention | L_HDL_PL_pct  | 0.070  | 0.185 | 0.713 |
| Control      | L_HDL_C_pct   | 0.151  | 0.164 | 0.379 |
| Intervention | L_HDL_C_pct   | -0.083 | 0.291 | 0.781 |
| Control      | L_HDL_CE_pct  | 0.157  | 0.203 | 0.455 |
| Intervention | L_HDL_CE_pct  | -0.059 | 0.282 | 0.838 |
| Control      | L_HDL_FC_pct  | 0.123  | 0.110 | 0.285 |
| Intervention | L_HDL_FC_pct  | -0.192 | 0.341 | 0.585 |
| Control      | L_HDL_TG_pct  | -0.098 | 0.288 | 0.739 |
| Intervention | L_HDL_TG_pct  | -0.368 | 0.297 | 0.241 |
| Control      | M_HDL_PL_pct  | -0.005 | 0.152 | 0.977 |
| Intervention | M_HDL_PL_pct  | -0.384 | 0.153 | 0.026 |
| Control      | M_HDL_C_pct   | 0.045  | 0.107 | 0.680 |
| Intervention | M_HDL_C_pct   | 0.248  | 0.135 | 0.089 |
| Control      | M_HDL_CE_pct  | -0.034 | 0.141 | 0.813 |
| Intervention | M_HDL_CE_pct  | 0.242  | 0.149 | 0.128 |
| Control      | M_HDL_FC_pct  | 0.253  | 0.140 | 0.094 |
| Intervention | M_HDL_FC_pct  | 0.212  | 0.106 | 0.066 |
| Control      | M_HDL_TG_pct  | -0.074 | 0.135 | 0.595 |
| Intervention | M_HDL_TG_pct  | -0.112 | 0.113 | 0.340 |
| Control      | S_HDL_PL_pct  | 0.118  | 0.395 | 0.770 |
| Intervention | S_HDL_PL_pct  | 0.130  | 0.296 | 0.668 |
| Control      | S_HDL_C_pct   | -0.122 | 0.330 | 0.718 |
| Intervention | S_HDL_C_pct   | -0.015 | 0.249 | 0.952 |
| Control      | S_HDL_CE_pct  | -0.134 | 0.323 | 0.684 |
| Intervention | S_HDL_CE_pct  | -0.013 | 0.245 | 0.957 |
| Control      | S_HDL_FC_pct  | 0.196  | 0.274 | 0.487 |
| Intervention | S_HDL_FC_pct  | 0.103  | 0.266 | 0.705 |
| Control      | S_HDL_TG_pct  | 0.001  | 0.109 | 0.990 |
| Intervention | S_HDL_TG_pct  | -0.134 | 0.077 | 0.105 |

---
